# Supplementary material for: The IL-15-Based ALT-803 Complex Enhances FcγRIIIa-Triggered NK Cell Responses and In Vivo Clearance of B Cell Lymphomas
Source: Oxford University Press journal article supplement (doi:10.1158/1078-0432.ccr-15-1419), 2015-09-30
Supplement: 10780432ccr151419-sup-151334_1_supp_3124366_ntx175.docx [file 10780432ccr151419-sup-151334_1_supp_3124366_ntx175.docx]

**Supplemental Table 1. Characteristics of primary iNHL patient samples used in this study.**

| **UPN** | **Age (years)** | **Gender** | **Grade** | **WHO** | **Disease status** | **Percent LN involvement** |
| --- | --- | --- | --- | --- | --- | --- |
| 238 | 63 | F | 1-2 | follicular | relapsed | 60% |
| 255 | 78 | M | 1-2 | follicular | relapsed | 12% |
| 313 | 63 | M | 1-2 | follicular | de novo | 38% |
| 372 | 65 | M | 1-2 | follicular | relapsed | 59% |
| 395 | 57 | F | 2/3a | follicular | relapsed | 60% |

*All lymph node samples were excisional biopsy specimens. ID: patient identifier, WHO: world health organization, LN: lymph node, UPN: unique patient number.
